# Supplementary material for: Source-tracking ESBL-producing bacteria at the maternity ward of Mulago hospital, Uganda
Source: PubMed Central journal article supplement (PMC10249850; doi:10.1371/journal.pone.0286955), 2023-06-08

# PLOS ONE

## Source-tracking ESBL-producing bacteria at the maternity ward of Mulago Hospital, Uganda --Manuscript Draft--

|                              |                                                                                                                                                                                                                                                                                                                                                                                                                                                                                                                                                                                                                                                                                                                                                                                                                                                                                                                                                                                                                                                                                                                                                                                                                                                                                                                                                                                                                                                                                                                                                                                                                                                                                                                                                                                                                                                                                                                                                                                                                                                                                                                                                                                                                                                                                                                                                                                                                                                                                                                                                                                                                                                                        |
|------------------------------|------------------------------------------------------------------------------------------------------------------------------------------------------------------------------------------------------------------------------------------------------------------------------------------------------------------------------------------------------------------------------------------------------------------------------------------------------------------------------------------------------------------------------------------------------------------------------------------------------------------------------------------------------------------------------------------------------------------------------------------------------------------------------------------------------------------------------------------------------------------------------------------------------------------------------------------------------------------------------------------------------------------------------------------------------------------------------------------------------------------------------------------------------------------------------------------------------------------------------------------------------------------------------------------------------------------------------------------------------------------------------------------------------------------------------------------------------------------------------------------------------------------------------------------------------------------------------------------------------------------------------------------------------------------------------------------------------------------------------------------------------------------------------------------------------------------------------------------------------------------------------------------------------------------------------------------------------------------------------------------------------------------------------------------------------------------------------------------------------------------------------------------------------------------------------------------------------------------------------------------------------------------------------------------------------------------------------------------------------------------------------------------------------------------------------------------------------------------------------------------------------------------------------------------------------------------------------------------------------------------------------------------------------------------------|
| <b>Manuscript Number:</b>    | PONE-D-23-06934                                                                                                                                                                                                                                                                                                                                                                                                                                                                                                                                                                                                                                                                                                                                                                                                                                                                                                                                                                                                                                                                                                                                                                                                                                                                                                                                                                                                                                                                                                                                                                                                                                                                                                                                                                                                                                                                                                                                                                                                                                                                                                                                                                                                                                                                                                                                                                                                                                                                                                                                                                                                                                                        |
| <b>Article Type:</b>         | Research Article                                                                                                                                                                                                                                                                                                                                                                                                                                                                                                                                                                                                                                                                                                                                                                                                                                                                                                                                                                                                                                                                                                                                                                                                                                                                                                                                                                                                                                                                                                                                                                                                                                                                                                                                                                                                                                                                                                                                                                                                                                                                                                                                                                                                                                                                                                                                                                                                                                                                                                                                                                                                                                                       |
| <b>Full Title:</b>           | Source-tracking ESBL-producing bacteria at the maternity ward of Mulago Hospital, Uganda                                                                                                                                                                                                                                                                                                                                                                                                                                                                                                                                                                                                                                                                                                                                                                                                                                                                                                                                                                                                                                                                                                                                                                                                                                                                                                                                                                                                                                                                                                                                                                                                                                                                                                                                                                                                                                                                                                                                                                                                                                                                                                                                                                                                                                                                                                                                                                                                                                                                                                                                                                               |
| <b>Short Title:</b>          | ESBL-producing bacteria at the maternity ward of Mulago Hospital, Uganda                                                                                                                                                                                                                                                                                                                                                                                                                                                                                                                                                                                                                                                                                                                                                                                                                                                                                                                                                                                                                                                                                                                                                                                                                                                                                                                                                                                                                                                                                                                                                                                                                                                                                                                                                                                                                                                                                                                                                                                                                                                                                                                                                                                                                                                                                                                                                                                                                                                                                                                                                                                               |
| <b>Corresponding Author:</b> | David Patrick Kateete, Ph.D., MSc, DVM<br>Makerere University Faculty of Medicine: Makerere University College of Health Sciences<br>Kampala, UGANDA                                                                                                                                                                                                                                                                                                                                                                                                                                                                                                                                                                                                                                                                                                                                                                                                                                                                                                                                                                                                                                                                                                                                                                                                                                                                                                                                                                                                                                                                                                                                                                                                                                                                                                                                                                                                                                                                                                                                                                                                                                                                                                                                                                                                                                                                                                                                                                                                                                                                                                                   |
| <b>Keywords:</b>             | Escherichia coli; Klebsiella pneumoniae; Enterobacter species; Gram-negative bacteria; ESBLs; Carbapenemases; Antibiotic resistance genes; PCR; multidrug resistance; MDR; Source-tracking; Cluster-analysis; Mulago hospital; Caesarian Surgical delivery; Pregnant women; Neonates; Health workers; Maternity ward; Animates; inanimates; Kampala; Uganda                                                                                                                                                                                                                                                                                                                                                                                                                                                                                                                                                                                                                                                                                                                                                                                                                                                                                                                                                                                                                                                                                                                                                                                                                                                                                                                                                                                                                                                                                                                                                                                                                                                                                                                                                                                                                                                                                                                                                                                                                                                                                                                                                                                                                                                                                                            |
| <b>Abstract:</b>             | <p><b>Introduction:</b> Escherichia coli, Klebsiella pneumoniae and Enterobacter (EKE) are the leading cause of mortality and morbidity in neonates in Africa. The management of EKE infections remains challenging given the global emergence of carbapenem resistance in Gram-negative bacteria. This study aimed to investigate the source of EKE organisms for neonates in the maternity environment of a national referral hospital in Uganda, by examining the phenotypic and molecular characteristics of isolates from mothers, neonates, and maternity ward.</p> <p><b>Methods:</b> From August 2015 to August 2016, we conducted a cross-section study of pregnant women admitted for elective surgical delivery at Mulago hospital in Kampala, Uganda; we sampled (nares, armpit, groin) a total of 137 pregnant women and their new-borns (n=137), as well as health workers (n=67) and inanimate objects (n=70 – beds, ventilator tubes, sinks, toilets, door-handles) in the maternity ward. Samples (swabs) were cultured for growth of EKE bacteria and isolates phenotypically/molecularly investigated for antibiotic sensitivity, <math>\beta</math>-lactamase and carbapenemase activity.</p> <p><b>Results:</b> Gram-negative bacteria were isolated from 21 mothers (15%), 15 neonates (11%), 2 health workers (3%), and 13 inanimate objects (19%); a total of 131 Gram-negative isolates were identified of which 104 were EKE bacteria i.e., 23 (22%) E. coli, 50 (48%) K. pneumoniae, and 31 (30%) Enterobacter. Carbapenems were the most effective antibiotics as 89% (93/104) of the isolates were susceptible to meropenem; however, multidrug resistance was prevalent i.e., 61% (63/104). Furthermore, carbapenemase production and carbapenemase gene prevalence were low i.e., 10% (10/104) and 6% (6/104), respectively; extended spectrum <math>\beta</math>-lactamase (ESBL) production occurred in 37 (36%) isolates though 61 (59%) carried ESBL-encoding genes, mainly blaCTX-M (93%, 57/61) indicating that blaCTX-M is the ideal gene for tracking ESBL-mediated resistance at Mulago. Moreover, spatial cluster-analysis of phenotypic/molecular susceptibility characteristics clustered isolates from mothers, their babies, health workers, and/or environment, revealing potential transmission of multidrug resistant EKE from mothers to neonates.</p> <p><b>Conclusion:</b> Our study shows evidence of transmission of drug resistant EKE in the maternity ward of Mulago hospital, and the dynamics in the ward are more likely to be responsible for transmission, but not individual mother characteristics.</p> |
| <b>Order of Authors:</b>     | Richard Mayanja<br>Adrian Muwonge<br>Dickson Aruhomukama<br>Fred Ashaba Katabazi<br>Mudarshiru Bbuye                                                                                                                                                                                                                                                                                                                                                                                                                                                                                                                                                                                                                                                                                                                                                                                                                                                                                                                                                                                                                                                                                                                                                                                                                                                                                                                                                                                                                                                                                                                                                                                                                                                                                                                                                                                                                                                                                                                                                                                                                                                                                                                                                                                                                                                                                                                                                                                                                                                                                                                                                                   |

|                                                                                                                                                                                                                                                                                                                                                                                                                                                                                                                                                                                                                                                                                                                                                                                                                                                                                                                                                                                                                                                                                                                                                                                                                                                                                                                                                                                     |                                                                     |
|-------------------------------------------------------------------------------------------------------------------------------------------------------------------------------------------------------------------------------------------------------------------------------------------------------------------------------------------------------------------------------------------------------------------------------------------------------------------------------------------------------------------------------------------------------------------------------------------------------------------------------------------------------------------------------------------------------------------------------------------------------------------------------------------------------------------------------------------------------------------------------------------------------------------------------------------------------------------------------------------------------------------------------------------------------------------------------------------------------------------------------------------------------------------------------------------------------------------------------------------------------------------------------------------------------------------------------------------------------------------------------------|---------------------------------------------------------------------|
|                                                                                                                                                                                                                                                                                                                                                                                                                                                                                                                                                                                                                                                                                                                                                                                                                                                                                                                                                                                                                                                                                                                                                                                                                                                                                                                                                                                     | Edgar Kigozi                                                        |
|                                                                                                                                                                                                                                                                                                                                                                                                                                                                                                                                                                                                                                                                                                                                                                                                                                                                                                                                                                                                                                                                                                                                                                                                                                                                                                                                                                                     | Annetee Nakimuli                                                    |
|                                                                                                                                                                                                                                                                                                                                                                                                                                                                                                                                                                                                                                                                                                                                                                                                                                                                                                                                                                                                                                                                                                                                                                                                                                                                                                                                                                                     | Musa Sekikubo                                                       |
|                                                                                                                                                                                                                                                                                                                                                                                                                                                                                                                                                                                                                                                                                                                                                                                                                                                                                                                                                                                                                                                                                                                                                                                                                                                                                                                                                                                     | Christine Florence Najjuka                                          |
|                                                                                                                                                                                                                                                                                                                                                                                                                                                                                                                                                                                                                                                                                                                                                                                                                                                                                                                                                                                                                                                                                                                                                                                                                                                                                                                                                                                     | David Patrick Kateete, Ph.D., MSc, DVM                              |
| <b>Additional Information:</b>                                                                                                                                                                                                                                                                                                                                                                                                                                                                                                                                                                                                                                                                                                                                                                                                                                                                                                                                                                                                                                                                                                                                                                                                                                                                                                                                                      |                                                                     |
| <b>Question</b>                                                                                                                                                                                                                                                                                                                                                                                                                                                                                                                                                                                                                                                                                                                                                                                                                                                                                                                                                                                                                                                                                                                                                                                                                                                                                                                                                                     | <b>Response</b>                                                     |
| <p><b>Financial Disclosure</b></p> <p>Enter a financial disclosure statement that describes the sources of funding for the work included in this submission. Review the <a href="#">submission guidelines</a> for detailed requirements. View published research articles from <a href="#">PLOS ONE</a> for specific examples.</p> <p>This statement is required for submission and <b>will appear in the published article</b> if the submission is accepted. Please make sure it is accurate.</p> <p><b>Unfunded studies</b><br/>Enter: <i>The author(s) received no specific funding for this work.</i></p> <p><b>Funded studies</b><br/>Enter a statement with the following details:</p> <ul style="list-style-type: none"> <li>• Initials of the authors who received each award</li> <li>• Grant numbers awarded to each author</li> <li>• The full name of each funder</li> <li>• URL of each funder website</li> <li>• Did the sponsors or funders play any role in the study design, data collection and analysis, decision to publish, or preparation of the manuscript?</li> <li>• <b>NO</b> - Include this sentence at the end of your statement: <i>The funders had no role in study design, data collection and analysis, decision to publish, or preparation of the manuscript.</i></li> <li>• <b>YES</b> - Specify the role(s) played.</li> </ul> <p>* typeset</p> | <p>The author(s) received no specific funding for this work.</p>    |
| <p><b>Competing Interests</b></p> <p>Use the instructions below to enter a competing interest statement for this submission. On behalf of all authors,</p>                                                                                                                                                                                                                                                                                                                                                                                                                                                                                                                                                                                                                                                                                                                                                                                                                                                                                                                                                                                                                                                                                                                                                                                                                          | <p>The authors have declared that no competing interests exist.</p> |

disclose any [competing interests](#) that could be perceived to bias this work—acknowledging all financial support and any other relevant financial or non-financial competing interests.

This statement is **required** for submission and **will appear in the published article** if the submission is accepted. Please make sure it is accurate and that any funding sources listed in your Funding Information later in the submission form are also declared in your Financial Disclosure statement.

View published research articles from [PLOS ONE](#) for specific examples.

#### **NO authors have competing interests**

Enter: *The authors have declared that no competing interests exist.*

#### **Authors with competing interests**

Enter competing interest details beginning with this statement:

*I have read the journal's policy and the authors of this manuscript have the following competing interests: [insert competing interests here]*

\* typeset

#### **Ethics Statement**

Enter an ethics statement for this submission. This statement is required if the study involved:

- Human participants
- Human specimens or tissue
- Vertebrate animals or cephalopods
- Vertebrate embryos or tissues
- Field research

Write "N/A" if the submission does not require an ethics statement.

Ethical approval was provided by the School of Biomedical Sciences Research and Ethics Committee at Makerere University (SBS-REC 434); a waiver of consent to use archived samples was provided by the SBS-REC. Authors did not have access to information that could identify individual participants during or after data collection.

General guidance is provided below. Consult the [submission guidelines](#) for detailed instructions. **Make sure that all information entered here is included in the Methods section of the manuscript.**

#### Format for specific study types

##### Human Subject Research (involving human participants and/or tissue)

- Give the name of the institutional review board or ethics committee that approved the study
- Include the approval number and/or a statement indicating approval of this research
- Indicate the form of consent obtained (written/oral) or the reason that consent was not obtained (e.g. the data were analyzed anonymously)

##### Animal Research (involving vertebrate animals, embryos or tissues)

- Provide the name of the Institutional Animal Care and Use Committee (IACUC) or other relevant ethics board that reviewed the study protocol, and indicate whether they approved this research or granted a formal waiver of ethical approval
- Include an approval number if one was obtained
- If the study involved *non-human primates*, add *additional details* about animal welfare and steps taken to ameliorate suffering
- If anesthesia, euthanasia, or any kind of animal sacrifice is part of the study, include briefly which substances and/or methods were applied

##### Field Research

Include the following details if this study involves the collection of plant, animal, or other materials from a natural setting:

- Field permit number
- Name of the institution or relevant body that granted permission

##### Data Availability

Yes - all data are fully available without restriction

Authors are required to make all data

underlying the findings described fully available, without restriction, and from the time of publication. PLOS allows rare exceptions to address legal and ethical concerns. See the [PLOS Data Policy](#) and [FAQ](#) for detailed information.

A Data Availability Statement describing where the data can be found is required at submission. Your answers to this question constitute the Data Availability Statement and **will be published in the article**, if accepted.

**Important:** Stating 'data available on request from the author' is not sufficient. If your data are only available upon request, select 'No' for the first question and explain your exceptional situation in the text box.

Do the authors confirm that all data underlying the findings described in their manuscript are fully available without restriction?

**Describe where the data may be found in full sentences. If you are copying our sample text, replace any instances of XXX with the appropriate details.**

- If the data are **held or will be held in a public repository**, include URLs, accession numbers or DOIs. If this information will only be available after acceptance, indicate this by ticking the box below. For example: *All XXX files are available from the XXX database (accession number(s) XXX, XXX).*
- If the data are all contained **within the manuscript and/or Supporting Information files**, enter the following: *All relevant data are within the manuscript and its Supporting Information files.*
- If neither of these applies but you are able to provide **details of access elsewhere**, with or without limitations, please do so. For example:

*Data cannot be shared publicly because of [XXX]. Data are available from the*

All relevant data are within the manuscript and its Supporting Information files.

*XXX Institutional Data Access / Ethics Committee (contact via XXX) for researchers who meet the criteria for access to confidential data.*

*The data underlying the results presented in the study are available from (include the name of the third party and contact information or URL).*

- This text is appropriate if the data are owned by a third party and authors do not have permission to share the data.

\* typeset

Additional data availability information:

1 **Source-tracking ESBL-producing bacteria at the maternity**  
2 **ward of Mulago Hospital, Uganda**

3

4 Richard Mayanja<sup>1,3&</sup>, Adrian Muwonge<sup>2\*¶</sup>, Dickson Aruhomukama<sup>1,3</sup>,  
5 Fred Ashaba Katabazi<sup>3</sup>, Mudarshiru Bbuye<sup>3</sup>, Edgar Kigozi<sup>3</sup>, Annetee  
6 Nakimuli<sup>4&</sup>, Musa Sekikubo<sup>4&</sup>, Christine Florence Najjuka<sup>1\*¶</sup> and David  
7 Patrick Kateete<sup>1,3\*¶</sup>

8

9 <sup>1</sup>Department of Medical Microbiology, School of Biomedical Sciences, Makerere  
10 University College of Health Sciences, Kampala, Uganda

11 <sup>2</sup>The Roslin Institute, College of Medicine and Veterinary studies, The Royal  
12 (Dick) School of Veterinary Studies, University of Edinburgh, Easter Bush,  
13 Midlothian, U.K.

14 <sup>3</sup>Department of Immunology and Molecular Biology, School of Biomedical  
15 Sciences, Makerere University College of Health Sciences, Kampala, Uganda

16 <sup>4</sup>Department of Obstetrics and Gynaecology, School of Medicine, Makerere  
17 University College of Health Sciences, Kampala, Uganda

18

19 \*Corresponding authors

20 [adrian.muwonge@roslin.ed.ac.uk](mailto:adrian.muwonge@roslin.ed.ac.uk) (AM)

21 [najjukafc@gmail.com](mailto:najjukafc@gmail.com) (CFN)

22 [david.kateete@mak.ac.ug](mailto:david.kateete@mak.ac.ug) (DPK)

23

24 ¶These authors contributed equally to this work.

25 &These authors also contributed equally to this work.

26



## 27 Abstract

28 **Introduction:** *Escherichia coli*, *Klebsiella pneumoniae* and *Enterobacter* (EKE) are the leading  
29 cause of mortality and morbidity in neonates in Africa. The management of EKE infections  
30 remains challenging given the global emergence of carbapenem resistance in Gram-negative  
31 bacteria. This study aimed to investigate the source of EKE organisms for neonates in the  
32 maternity environment of a national referral hospital in Uganda, by examining the phenotypic  
33 and molecular characteristics of isolates from mothers, neonates, and maternity ward.

34 **Methods:** From August 2015 to August 2016, we conducted a cross-section study of pregnant  
35 women admitted for elective surgical delivery at Mulago hospital in Kampala, Uganda; we  
36 sampled (nares, armpit, groin) a total of 137 pregnant women and their new-borns (n=137), as  
37 well as health workers (n=67) and inanimate objects (n=70 – beds, ventilator tubes, sinks, toilets,  
38 door-handles) in the maternity ward. Samples (swabs) were cultured for growth of EKE bacteria  
39 and isolates phenotypically/molecularly investigated for antibiotic sensitivity,  $\beta$ -lactamase and  
40 carbapenemase activity.

41 **Results:** Gram-negative bacteria were isolated from 21 mothers (15%), 15 neonates (11%), 2  
42 health workers (3%), and 13 inanimate objects (19%); a total of 131 Gram-negative isolates were  
43 identified of which 104 were EKE bacteria i.e., 23 (22%) *E. coli*, 50 (48%) *K. pneumoniae*, and  
44 31 (30%) *Enterobacter*. Carbapenems were the most effective antibiotics as 89% (93/104) of the  
45 isolates were susceptible to meropenem; however, multidrug resistance was prevalent i.e., 61%  
46 (63/104). Furthermore, carbapenemase production and carbapenemase gene prevalence were low  
47 i.e., 10% (10/104) and 6% (6/104), respectively; extended spectrum  $\beta$ -lactamase (ESBL)  
48 production occurred in 37 (36%) isolates though 61 (59%) carried ESBL-encoding genes, mainly  
49 *bla*<sub>CTX-M</sub> (93%, 57/61) indicating that *bla*<sub>CTX-M</sub> is the ideal gene for tracking ESBL-mediated

50 resistance at Mulago. Moreover, spatial cluster-analysis of phenotypic/molecular susceptibility  
51 characteristics clustered isolates from mothers, their babies, health workers, and/or environment,  
52 revealing potential transmission of multidrug resistant EKE from mothers to neonates.

53 **Conclusion:** Our study shows evidence of transmission of drug resistant EKE in the maternity  
54 ward of Mulago hospital, and the dynamics in the ward are more likely to be responsible for  
55 transmission, but not individual mother characteristics.

56

## 57 Introduction

58 The World Health Organization (WHO) estimates that 5 million neonatal deaths occur annually,  
59 disproportionately affecting populations in the developing countries. Septicaemia is among the  
60 leading causes of morbidity and mortality in neonates and infants in the developing countries [1].

61 In addition to causing common skin and urinary tract infections, members of the  
62 *Enterobacteriaceae* family, especially *Escherichia coli*, *Klebsiella pneumoniae*, and  
63 *Enterobacter* species (spp.), are reported to be the leading cause of septicaemia in Africa [2].

64 Clinicians increasingly recognise septicaemia as a life-threatening condition due to organ failure  
65 resulting from host deregulations and cellular metabolic breakdown [3]. Therefore, immediate  
66 clinical management is needed, which is dominated by use of the  $\beta$ -lactam class of antibiotics,

67 especially the extended-spectrum  $\beta$ -lactam agents like the third-generation cephalosporins (e.g.,  
68 ceftriaxone, ceftazidime). However, Gram-negative bacteria, especially members of the  
69 *Enterobacteriaceae* family, have increasingly become resistant to third-generation

70 cephalosporins [4]. This makes infections they cause increasingly difficult to manage.  
71 Phenotypically, drug resistant *E. coli*, *K. pneumoniae*, and *Enterobacter* spp. produce  $\beta$ -  
72 lactamases that block the action of antibiotics. Genotypically, these bacteria harbour extended

73 spectrum  $\beta$ -lactamase (ESBL) encoding genetic elements like *bla*<sub>CTX-M</sub>, *bla*<sub>TEM</sub>, and *bla*<sub>SHV</sub>, as  
74 well as AmpC encoding genes like *DHA*, *CMY*, and *CIT*. ESBL mediated resistance is prevalent  
75 among the *Enterobacteriaceae* in African settings, for example in Uganda and Tanzania, where  
76 management using cephalosporins has been reported [5]. Moreover, ESBL-producing  
77 *Enterobacteriaceae* carry additional genetic elements like *bla*<sub>VIM</sub>, *bla*<sub>IMP</sub>, *bla*<sub>KPC</sub>, *bla*<sub>OXA-48</sub>, and  
78 *bla*<sub>NDM</sub>, which encode carbapenemases i.e., VIM (veronica integrin Metallo-beta-lactamases),  
79 IMP (imipenemase), KPC (*Klebsiella pneumoniae* carbapenemase), OXA-48 (oxacillinase-48),  
80 and NDM-1 (New Delhi Metallo-beta-lactamase-1), respectively [6]. The carbapenemases  
81 hydrolyse almost all  $\beta$ -lactam antibiotics [7], and enable resistance to carbapenems, a group of  
82 highly effective antibiotics [8].

83  
84 Antibiotic-resistant bacteria become ubiquitous when susceptible sub-populations that do not  
85 carry resistance genes are exposed to antibiotics that kill susceptible bacteria, thus selecting for  
86 resistant populations [9]. Furthermore, it is widely accepted that a history of visiting a hospital is  
87 a risk factor for acquisition of ESBL-producing Gram-negative bacteria, which are known for  
88 colonizing hospital surfaces, health workers, and pregnant women accessing prenatal hospital  
89 services [10][11]. This inherently makes neonates/infants an extremely high-risk group. Over the  
90 last 20 years, Mulago National Referral Hospital in Kampala, Uganda, has registered a  
91 considerable increase in neonatal morbidity and mortality predominantly caused by Gram-  
92 negative bacteria [12]. Moreover, studies conducted in Uganda have shown that ESBL-  
93 producing isolates are highly resistant to third-generation cephalosporins, specifically  
94 ceftazidime and cefotaxime [3], and that ESBL production occurs at variable levels at the

95 hospital [12][5]. This, coupled with their ability to persist in hospital environments, makes  
96 ESBL-producing bacteria a significant health risk to neonates [13].

97

98 DNA amplification techniques combined with conventional phenotypic characterization of  
99 clinical resistance allows not only to cost-effectively ascribe phenotypic resistance to responsible  
100 genes, but also supports source-tracking at the hospital and community level in a resource-  
101 limited setting [14][15][16]. In this study, we examined the dispersal of ESBL-producing  
102 bacteria in the maternity ward at Mulago hospital using phenotypic and genotypic characteristics  
103 of the isolates, and identified the potential source of drug resistant bacteria for neonates. This is  
104 critical for understanding the clinical and sanitary points of control, hence contributing to the  
105 reduction of hospital-acquired antimicrobial resistance.

106

## 107 **Methods**

### 108 **Study setting, participants and isolates**

109 The study was conducted at Mulago hospital in Kawempe division, 3 km from Kampala city  
110 centre. Mulago serves as both the national referral hospital for Uganda and a teaching hospital  
111 for Makerere University; it is the largest public hospital in the country with 1,600 beds and a  
112 1:40 doctor-to-patient ratio. It receives about 100 pregnant women daily, delivering up to 60  
113 babies by ~50 midwives. Nearly half of these babies are born by Caesarean section [17].  
114 According to hospital records there were 31,201 babies born in 2010, 33,331 in 2011, 33,231 in  
115 2012 and 31,400 in 2013; in 2014, 30,000 babies were delivered at the hospital, which is about  
116 68% of all the babies born in Uganda, giving it a claim to the top position of the busiest labour  
117 wards in the world [17].

118 **Study design and eligibility criteria**

119 The study design was cross-sectional, centred around the routine maternity activities at the  
120 hospital. The study analysed *Enterobacteriaceae* isolates cultured from samples (swabs)  
121 collected in a parallel study that looked at community methicillin resistant *Staphylococcus*  
122 *aureus* (MRSA) carriage and nosocomial MRSA acquisition among pregnant women in the  
123 maternity ward during August 2015 and August 2016, **Fig 1**. With consent, 137 pregnant women  
124 admitted to the hospital for elective surgical delivery (Caesarean section) were recruited, and  
125 subsequently were the babies delivered by the women. Samples (nasal, armpit and groin swabs)  
126 were collected from the pregnant women at admission, delivery and discharge from the hospital  
127 (**Fig 1**); as well, samples were collected from neonates following surgical delivery. In case a  
128 mother or baby developed sepsis, swabs were collected from wounds or the vagina or baby's  
129 cord to investigate the cause of sepsis. Also, we collected 137 environment samples – from  
130 health workers (n=67, hereafter animate samples) who were handling the mothers/babies, as well  
131 as beds, ventilator tubes, sinks, toilets, and door-handles (n=70, hereafter inanimate samples) in  
132 the labour ward. Overall, approx. 820 swab samples were processed and investigated for growth  
133 of *K. pneumoniae*, *E. coli* and *Enterobacter* spp.

134

135 **Fig 1. Study schematic depicting participants and sampling timelines.**

136

137 The laboratory procedures were carried out from the Clinical Microbiology and Molecular  
138 Biology Laboratories of the College of Health Sciences, Makerere University. The Clinical  
139 Microbiology Laboratory participates in the College of American Pathologists' bacteriology  
140 external quality assurance scheme (CAP no. 7225593). In the laboratory, samples were

141 inoculated on nonselective media (blood agar) and incubated overnight at 37 °C in ambient air;  
142 among the isolates obtained, a significant number (n=167) with features suggestive of  
143 *Enterobacteriaceae* were identified and stored in 20% brain heart infusion (BHI)-glycerol at -20  
144 °C. These are the isolates of interest that we retrieved and investigated; isolates were recovered  
145 by sub-culturing on blood agar at 37 °C in ambient air for 18-24 hours, and sub-culturing on  
146 MacConkey agar at 37 °C in ambient air for 12 hours. Identification of isolates to species level  
147 was based on phenotypic characteristics i.e., Gram staining and biochemical tests i.e., oxidase  
148 test, triple sugar iron agar (TSIA), indole, citrate utilization and urease production tests [18].

149

#### 150 **Antibiotic sensitivity testing**

151 Antibiotic sensitivity testing was done with the Kirby-Bauer disc diffusion test [6] using  
152 sensitivity discs – ceftriaxone (CRO, 30 µg), cefotaxime (CTX, 30 µg), cefepime (FEP, 30 µg),  
153 ceftazidime (CAZ, 30 µg), ceftazidime/avibactam (CAZ/AVI, 30 µg /  
154 200 µg/ml), meropenem (MEM, 10 µg), meropenem/ethylenediaminetetraacetic acid  
155 (MEM/EDTA, 30 µg/100 µg/ml), ciprofloxacin (CIP, 5 µg), gentamicin (CN, 10 µg),  
156 chloramphenicol (C, 30 µg), tetracycline (TE, 30 µg), trimethoprim/sulfamethoxazole (SXT,  
157 1.25/23.75µg), amoxicillin-clavulanate (AMC, 30 µg), aztreonam (ATM, 30 µg), and  
158 piperacillin-tazobactam (TPZ, 110 µg). Briefly, an inoculum was prepared from a pure culture  
159 plate of a test isolate grown overnight. This was done by touching with a sterile loop the top of 3-  
160 to-5 colonies of similar appearance, suspending in normal saline and adjusting turbidity to 0.5  
161 McFarland (approx.  $1.5 \times 10^8$  colony forming units [CFU]). Adjusting the density of the test  
162 suspension to that of the standard was done by adding more bacterial suspension or sterile  
163 normal saline. A sterile cotton swab was dipped into the bacterial suspension, and excess liquid

164 removed by rotating the swab several times with firm pressure on the inside wall of the tube  
165 above the fluid level. Using the swab, a Mueller Hinton Agar (MHA) plate was streaked to form  
166 a bacterial lawn. To obtain uniform growth, the plate was streaked with the swab in one  
167 direction, rotated at 60 degrees and streaked again in another direction. The rotation was repeated  
168 three times then the swab passed round the edge of agar surface as it was drawn across the plate.  
169 The plate was allowed to air-dry for about 3-5 minutes before adding the antibiotic disc. Using a  
170 sterile pair of forceps, the antibiotic disc was added to the media plate and gently pressed on the  
171 agar to ensure it was attached. MHA plates with antibiotic discs were incubated at 37 °C  
172 overnight in ambient air, after which zones of inhibition (in mm) were measured using a divider  
173 and ruler and interpreted according to the Clinical and Laboratory Standards Institute (CLSI)  
174 guidelines (2015) [19].

175

#### 176 **ESBL screening**

177 Isolates with inhibition zone diameters suggestive of ESBL production i.e., ceftriaxone (CRO) =  
178 23 mm, cefotaxime (CTX) = 26 mm, aztreonam (ATM) = 21 mm, and ceftazidime (CAZ) = 21  
179 mm [20] were screened for ESBL production using the double disc synergy test and the modified  
180 double disc synergy test (MDDST), in which cefepime (FEP) replaced ceftriaxone [21]. An  
181 amoxicillin-clavulanate disc (20/10 µg) along with four cephalosporins discs i.e., cefotaxime,  
182 ceftriaxone, ceftazidime, and cefepime, were used. A lawn culture of the test isolate was made  
183 on an MHA plate with an amoxicillin-clavulanate disc placed in the centre of the plate. Then,  
184 cefotaxime, ceftriaxone, ceftazidime, and cefepime discs were placed 20 mm centre-to-centre to  
185 the amoxicillin-clavulanate disc and incubated overnight at 37 °C. Any distortion or increase in  
186 the zone of clearance towards the amoxicillin-clavulanate disc was considered positive for ESBL

187 production; *K. pneumoniae* strain 700603 and *E. coli* strain 25922 were used as the positive and  
188 negative controls, respectively.

189

### 190 **Screening for AmpC enzymes**

191 Isolates with a cefoxitin inhibition zone diameter of  $\leq 17$  mm were screened for AmpC enzyme  
192 production using cefoxitin disc (30  $\mu\text{g}$ ) and cefoxitin (30  $\mu\text{g}$ ) + cloxacillin (200  $\mu\text{g}$ ) discs on  
193 MHA plates incubated overnight at 37 °C. The inhibition zone diameter around the cefoxitin +  
194 cloxacillin disc was compared to that of cefoxitin without cloxacillin for confirmation of AmpC  
195  $\beta$ -lactamase production. An inhibition zone diameter difference of  $\geq 4$  mm was interpreted as  
196 positive for AmpC production. Cloxacillin was used as the inhibitor for AmpC enzyme activity,  
197 while *E. coli* strain ATCC25922 was used as the negative control [6].

198

### 199 **Screening for carbapenemases**

200 Isolates with a meropenem (10  $\mu\text{g}$ ) inhibition zone diameter of  $\leq 23$ mm were screened for  
201 carbapenemase production using the modified Hodge's test (MHT) [22]. A 1:10 dilution of the  
202 indicator/susceptible organism (*E. coli* ATCC 25922) was adjusted to turbidity equivalent to 0.5  
203 McFarland in normal saline, streaked on MHA plate and air-dried for 5-10 minutes, and a  
204 meropenem disc (10  $\mu\text{g}$ ) placed in the centre of the plate. Test isolates were streaked outward  
205 from the disc to the edge of the plate (20-25 mm in length) using a sterile swab.  $\beta$ -lactamase  
206 production was verified based on distortion of the inhibition zone. The same procedure was  
207 carried out for the positive control (*K. pneumoniae* ATCC® BAA-1705™) and the negative  
208 control (*K. pneumoniae* ATCC® BAA-1706™). Plates were incubated in ambient air for 16-20  
209 hours at 37 °C and results interpreted according to the CLSI (2015) guidelines. Briefly, a positive



210 result had enhanced growth around the positive control streak at the intersection of the zone of  
211 inhibition (i.e., formation of a clover-leaf indentation of indicator strain growing along the streak  
212 of the test organism within the antimicrobial diffusion diameter); on the other hand, a negative  
213 result had no growth of the indicator strain along the streak of the test isolate within the disc  
214 diffusion zone.

215

216 To screen for metallo-beta-lactamase production, an overnight culture of a test isolate equivalent  
217 to 0.5 McFarland was inoculated on MHA plates using a sterile swab. After 5-10 minutes of  
218 drying, two meropenem discs (10 µg) were placed on the surface of the agar 15 mm apart,  
219 centre-to-centre. Ten microliters of 0.5 M EDTA was added to one of the meropenem discs and  
220 incubated at 37 °C overnight. An increase in the zone of inhibition by  $\geq 5$  mm around the EDTA  
221 potentiated disc was interpreted as positive for metallo- $\beta$ -lactamase production.

222

### 223 **Detection of antibiotic resistance genetic elements**

224 Isolates screened for ESBL and carbapenemase activity were molecularly investigated for ESBL-  
225 and carbapenemase gene carriage. We used conventional PCR to detect *bla*<sub>CTX-M</sub>, *bla*<sub>TEM</sub>, and  
226 *bla*<sub>SHV</sub> genes which confer bacterial resistance to  $\beta$ -lactam agents except carbapenems and  
227 cephamycin [8]. We also used PCR to detect carbapenemase encoding genes *bla*<sub>VIM</sub>, *bla*<sub>IMP</sub>, and  
228 *bla*<sub>NDM</sub>. Except for the *bla*<sub>CTX-M</sub> gene variants where we used inhouse primers, we used  
229 previously published primers and conditions for the PCRs [23][6], **S1 Table**. PCR amplicons  
230 were analysed by gel electrophoresis on a 1.5 % agarose gel stained with ethidium bromide and  
231 viewing DNA bands in a UV trans-illuminator. Isolates that were previously confirmed to be  
232 positive or negative for the genes being investigated were used as positive and negative controls,

233 respectively. Furthermore, PCR-amplicons were sequenced to confirm the resistance genes  
234 through BLAST searches at the National Centre for Biotechnology Information (NCBI)  
235 <https://blast.ncbi.nlm.nih.gov/Blast.cgi>

236

### 237 **Data analysis**

238 Disc diffusion using the Kirby Bauer method was interpreted according to CLSI guidelines[19]  
239 Microsoft Excel 2016 and SPSS version 16.0 were used for data entry and statistical analyses.  
240 Differences in proportions and means were compared using the chi<sup>2</sup> and the student t-test,  
241 respectively. A p-value of <0.05 was considered statistically significant. The cluster analysis of  
242 phenotypic and genotypic profiles of the samples was done using Ridom GmbH, Münster,  
243 Germany. Here the phylogenetic analysis module was used to cluster phenotypes or genotypes  
244 by similarity of profile and then visualized using UPGMA phylogenetic tree.

245

### 246 **Ethical considerations**

247 Ethical approval was provided by the School of Biomedical Sciences Research and Ethics  
248 Committee at Makerere University (SBS-REC 434); a waiver of consent to use archived samples  
249 was provided by the SBS-REC. Authors did not have access to information that could identify  
250 individual participants during or after data collection.

## 251 **Results and discussion**

### 252 **Participants' demographics and bacterial isolates**

253 One hundred and thirty-seven pregnant women who underwent Caesarean surgical delivery (C-  
254 section) and their natal babies (n=137 – there were no multiple pregnancies) were screened for

255 contamination with *E. coli*, *K. pneumoniae* and *Enterobacter* spp. Key demographics of the  
 256 mothers are summarized in **Table 1**. Overall, Gram-negative bacteria were isolated from 21  
 257 mothers, 15 babies (neonates), 2 health workers, and 13 inanimate objects, **Table 2**. A total of  
 258 131 Gram-negative isolates were identified, of which 104 isolates were of our interest i.e., *E.*  
 259 *coli*, *K. pneumoniae* and *Enterobacter* spp.; *K. pneumoniae* was the most prevalent species  
 260 (38%, 50/131) followed by *Enterobacter* spp. (24%, 31/131), **Table 2**. Other Gram-negative  
 261 bacteria were identified but not discuss further – these include *Citrobacter* spp., *Pseudomonas*  
 262 spp., and *Acinetobacter* spp., **Table 3**.

263 **Table 1: Demographics of pregnant women (n=137) who underwent Caesarean surgical**  
 264 **delivery and screened for isolation of *E. coli*, *K. pneumoniae* and *Enterobacter* spp.**

| Variable                   | Categorization                | n (%)   |
|----------------------------|-------------------------------|---------|
| Education level attained   | Primary                       | 30 (22) |
|                            | Secondary or Vocational       | 65 (47) |
|                            | Advanced level                | 25 (18) |
|                            | Tertiary institute*           | 9 (7)   |
|                            | Bachelor's degree             | 8 (6)   |
| Religion                   | Roman Catholic                | 58 (42) |
|                            | Protestant                    | 41 (30) |
|                            | Moslem                        | 14 (10) |
|                            | Pentecostal                   | 7 (5)   |
|                            | Others                        | 17 (12) |
| Sample site and time point | Groin at admission            | 23 (17) |
|                            | Groin at discharge            | 58 (42) |
|                            | Axillar (on admission)        | 0       |
|                            | Axillar (on discharge)        | 32 (23) |
|                            | Anterior nares (on admission) | 24 (18) |

265 \* Tertiary but not university

266

267 **Table 2: *E. coli*, *K. pneumoniae* and *Enterobacter* spp. isolated and investigated (n=104)**

| Source               | <i>E. coli</i> (%) | <i>K. pneumoniae</i> (%) | <i>Enterobacter</i> spp. (%) | Total* |
|----------------------|--------------------|--------------------------|------------------------------|--------|
| Mother, 21/137 (15%) | 05 (4)             | 18 (13)                  | 07 (5)                       | 30     |

|                                  |                |                |                |            |
|----------------------------------|----------------|----------------|----------------|------------|
| Baby, 15/137 (11%)               | 05 (4)         | 15 (11)        | 10 (7)         | <b>30</b>  |
| Environment (animate): 2/67 (3%) | 10 (15)        | 06 (9)         | 02 (3)         | <b>18</b>  |
| Inanimate, 13/70 (19%)           | 03 (1)         | 11 (16)        | 12 (17)        | <b>26</b>  |
| <b>Total (%)</b>                 | <b>23 (22)</b> | <b>50 (48)</b> | <b>31 (30)</b> | <b>104</b> |

268 \*Some participants/objects grew multiple bacterial species (i.e., polymicrobial samples)

269

270 **Table 3: Other Gram-negative bacteria identified**

| Source                         | <i>Citrobacter</i> | <i>Acinetobacter</i> | <i>Pseudomonas</i> | <i>K. oxytoca</i> | Total     |
|--------------------------------|--------------------|----------------------|--------------------|-------------------|-----------|
| Mother (n=137)                 | 7                  | 5                    | 2                  | 0                 | 14        |
| Baby (n=137)                   | 2                  | 6                    | 1                  | 1                 | 10        |
| Health workers (n=67)          | 6                  | 7                    | 2                  | 0                 | 15        |
| Environment (Inanimate) (n=70) | 2                  | 0                    | 0                  | 0                 | 2         |
| <b>Total</b>                   | <b>17</b>          | <b>18</b>            | <b>5</b>           | <b>1</b>          | <b>41</b> |

271

272

### 273 Antibiotic susceptibility profiles

274 The highest drug sensitivity level was noted for carbapenem antibiotics whereby 97% (30/31) of  
 275 *Enterobacter* spp., 89% (44/50) of *K. pneumoniae*, and 82% (19/23) of *E. coli* isolates were  
 276 susceptible to meropenem, **Table 4**. Nevertheless, 58% (29/50) of *K. pneumoniae* isolates, 70%  
 277 (16/23) of *E. coli*, and 58% (18/31) of *Enterobacter* spp. were multidrug resistant; to determine  
 278 multidrug resistance (MDR), resistance to  $\beta$ -lactams, aminoglycosides, trimethoprim-  
 279 sulfamethoxazole, tetracyclines and fluoroquinolones was considered. **Table 5** depicts the  
 280 resistance combinations noted and virtually all patterns involved a non- $\beta$ -lactam agent; the most  
 281 common MDR pattern in *K. pneumoniae* was gentamicin+chloramphenicol+trimethoprim-  
 282 sulfamethoxazole while for *E. coli* and *Enterobacter* it was  
 283 ciprofloxacin+gentamicin+chloramphenicol+tetracycline+trimethoprim-sulfamethoxazole.

284

285 **Table 4: Antibiotic susceptibility characteristics n, (%)\***

| Species                        | AMC        | TPZ        | CRO        | CTX        | CAZ        | ATM        | FEP        | FOX        | MEM        | SXT        | CIP        | CN         | C          | TE         |
|--------------------------------|------------|------------|------------|------------|------------|------------|------------|------------|------------|------------|------------|------------|------------|------------|
| <i>E. coli</i><br>(n=23)       | 16<br>(70) | 14<br>(61) | 8<br>(35)  | 8<br>(35)  | 4<br>(17)  | 10<br>(44) | 4<br>(17)  | 12<br>(52) | 19<br>(83) | 10<br>(44) | 5<br>(22)  | 10<br>(44) | 14<br>(61) | 9<br>(39)  |
| <i>K. pneumoniae</i><br>(n=50) | 30<br>(60) | 25<br>(50) | 18<br>(36) | 13<br>(26) | 21<br>(38) | 21<br>(42) | 18<br>(36) | 41<br>(82) | 44<br>(88) | 13<br>(26) | 5<br>(10)  | 26<br>(52) | 19<br>(38) | 36<br>(72) |
| Enterobacter<br>(n=31)         | 10<br>(32) | 18<br>(58) | 8<br>(26)  | 13<br>(42) | 10<br>(32) | 13<br>(42) | 14<br>(45) | 2<br>(7)   | 30<br>(97) | 14<br>(45) | 20<br>(65) | 11<br>(36) | 15<br>(48) | 20<br>(65) |

286 AMC, ampicillin-sulbactam; TPZ, piperacillin-tazobactam; CRO, ceftriaxone; CTX, cefotaxime; CAZ, ceftazidime; ATM,  
 287 aztreonam; FEP, meropenem; FOX, ceftazidime; MEM, meropenem; SXT, trimethoprim-sulfamethoxazole; CIP, ciprofloxacin;  
 288 CN, gentamicin; C, chloramphenicol; TE, tetracycline

289 \*Refers to percentage of drug susceptible isolates

290

291 **Table 5: Multiple resistance patterns to classes of antibiotics**

| Combination     | <i>K. pneumoniae</i><br>n=50 (%) | <i>E. coli</i><br>n=23 (%) | Enterobacter<br>spp., n=31 (%) |
|-----------------|----------------------------------|----------------------------|--------------------------------|
| C+SXT           | 5 (10%)                          | 1 (4%)                     | 0                              |
| C+TE            | 1 (2%)                           | 0                          | 0                              |
| C+CN            | 0                                | 0                          | 2 (6%)                         |
| CN+SXT          | 0                                | 0                          | 1 (3%)                         |
| CIP+SXT         | 0                                | 1 (4%)                     | 0                              |
| CIP+TE          | 2 (4%)                           | 0                          | 0                              |
| TE+SXT          | 1 (2%)                           | 0                          | 1 (3%)                         |
| CN+C+SXT        | 9 (18%)                          | 0                          | 0                              |
| CN+TE+SXT       | 0                                | 1 (4%)                     | 1 (3%)                         |
| CN+C+SXT        | 0                                | 0                          | 3 (10%)                        |
| CIP+C+SXT       | 2 (4%)                           | 0                          | 0                              |
| CIP+TE+SXT      | 1 (2%)                           | 4 (17%)                    | 0                              |
| CIP+CN+SXT      | 0                                | 1 (4%)                     | 0                              |
| C+TE+SXT        | 1 (2%)                           | 1 (4%)                     | 0                              |
| CIP+CN+TE+SXT   | 0                                | 0                          | 1 (3%)                         |
| CIP+CN+C+SXT    | 0                                | 0                          | 1 (3%)                         |
| CIP+C+TE+SXT    | 0                                | 1 (4%)                     | 0                              |
| CN+C+TE+SXT     | 5 (10%)                          | 1 (4%)                     | 2 (6%)                         |
| CIP+CN+C+TE+SXT | 2 (4%)                           | 5 (22%)                    | 6 (19%)                        |

292 SXT, trimethoprim-sulfamethoxazole; CIP, ciprofloxacin; CN, gentamicin; C, chloramphenicol; TE, tetracycline

293

294 **Characterisation of beta-lactamases and carbapenemases**

295 ESBL, AmpC and carbapenemase activity was detected in all the three species; ESBL activity  
 296 was highest in *K. pneumoniae* (50%) while AmpC activity was highest in *Enterobacter* spp.  
 297 (45%). However, carbapenemase activity was comparatively low, **Table 6**.

298

299 **Table 6: Prevalence of beta-lactamases and carbapenemases**

| Species                         | ESBLs alone (%) | AmpC alone (%) | ESBL+AmpC (%) | Carbapenemases (%) |
|---------------------------------|-----------------|----------------|---------------|--------------------|
| <i>E. coli</i> (n=23)           | 9 (39)          | 5 (22)         | 6 (26)        | 3 (13)             |
| <i>K. pneumoniae</i> (n=50)     | 25 (50)         | 6 (12)         | 3 (6)         | 6 (12)             |
| <i>Enterobacter</i> spp. (n=31) | 3 (10)          | 14 (45)        | 12 (39)       | 1 (3)              |

300

301 **Characteristics of genetic determinants of antibiotic resistance**

302 **Table 7** and **S2 Table** depict the frequency and distribution of the antibiotic resistance genetic  
 303 elements associated with resistance to  $\beta$ -lactams and carbapenems. Overall, ESBL and  
 304 carbapenemase encoding genes were detected in 59% (61/104) of the isolates and the former  
 305 were more prevalent particularly the *bla*<sub>CTXM-U/15</sub> gene. While *bla*<sub>CTX-M</sub>, *bla*<sub>TEM</sub> and *bla*<sub>SHV</sub>  
 306 occurred in isolates regardless of phenotypic ESBL-activity, *bla*<sub>VIM</sub>, *bla*<sub>NDM</sub> and *bla*<sub>IMP</sub> occurred  
 307 in only carbapenemase-producing isolates. Furthermore, *bla*<sub>CTX-M-15</sub> was the only *bla*<sub>CTX-M</sub> gene  
 308 found in *E. coli* and *Enterobacter* spp. while it occurred in 23 of the 29 ESBL gene positive *K.*  
 309 *pneumoniae* isolates, implying that the six *K. pneumoniae* isolates with the universal *bla*<sub>CTX-M-U</sub>  
 310 gene carried other *bla*<sub>CTX-M</sub> types. Overall, these data show that *bla*<sub>CTX-M-15</sub> is a predominant  
 311 ESBL gene in this setting. Furthermore, carriage of multiple resistance genetic elements was  
 312 frequent in *K. pneumoniae* and *Enterobacter* spp., especially ESBL genes and the most common  
 313 pattern was *bla*<sub>CTXM-U/15</sub> + *bla*<sub>SHV</sub>, implying that the *bla*<sub>TEM</sub> and *bla*<sub>SHV</sub> genes in this setting are  
 314 co-transmitted with *bla*<sub>CTXM-U/15</sub> in that carriage of *bla*<sub>TEM</sub> alone or *bla*<sub>SHV</sub> alone wasn't seen. On  
 315 the other hand, the carbapenemase genes were less prevalent and occurred in only six isolates, **S2**

316 **Table.** Note, while the carbapenemase gene prevalence is low in this study, four of the six  
 317 carbapenemase gene positive isolates (i.e., *bla*<sub>VIM+</sub>, *bla*<sub>IMP+</sub> & *bla*<sub>NDM+</sub>) co-carried the genes,  
 318 and almost all were *ESBL* gene positive, **S2 Table**.

319

320 **Table 7. Summary of the antibiotic resistance genes among PCR-positive isolates**

| Species                         | <i>bla</i> <sub>CTXM-U</sub> | <i>bla</i> <sub>CTXM-15</sub> | <i>bla</i> <sub>TEM</sub> | <i>bla</i> <sub>SHV</sub> | <i>bla</i> <sub>VIM</sub> | <i>bla</i> <sub>IMP</sub> | <i>bla</i> <sub>NDM</sub> |
|---------------------------------|------------------------------|-------------------------------|---------------------------|---------------------------|---------------------------|---------------------------|---------------------------|
| <i>E. coli</i><br>n=23 (%)      | 12 (52)                      | 12 (52)                       | 7 (30)                    | 3 (13)                    | 02 (9)                    | 02 (9)                    | 02 (9)                    |
| <i>Klebsiella</i><br>n=50 (%)   | 29 (58)                      | 23 (46)                       | 10 (20)                   | 23 (46)                   | 02 (4)                    | 01 (2)                    | 0                         |
| <i>Enterobacter</i><br>n=31 (%) | 16 (52)                      | 16 (52)                       | 09 (29)                   | 3 (10)                    | 01 (3)                    | 0                         | 0                         |
| <b>Total</b>                    | <b>57</b>                    | <b>51</b>                     | <b>26</b>                 | <b>29</b>                 | <b>05</b>                 | <b>03</b>                 | <b>02</b>                 |

321

322 **Inferring transmission from clustering of drug resistance phenotypes and genotypes**

323 For an insight into the source/transmission of MDR *E. coli*, *K. pneumoniae* and *Enterobacter*  
 324 spp. in the maternity ward, spatial cluster analysis of phenotypic and genotypic susceptibility  
 325 characteristics was performed and the analyses presented as dendrograms for inferring  
 326 relationships, **Figs 2 & 3**. Based on phenotypic susceptibility characteristics, seven clusters  
 327 comprising two or more isolates from mothers, their babies, health workers (animate), and/or  
 328 environment (inanimate) were noted, **Fig 2**. As well, isolates from mothers with susceptibility  
 329 characteristics similar to isolates from babies that were not their own were noted. Furthermore,  
 330 based on molecular susceptibility characteristics, eight clusters comprising two to eight isolates  
 331 from mothers, their babies, health workers (animate), and/or environment (inanimate) were  
 332 noted, **Fig 3**. Overall, these data allude to occurrence of epidemiological links for the clustered  
 333 isolates hence, transmission in the maternity ward of MDR *E. coli*, *K. pneumoniae* and  
 334 *Enterobacter* spp. from mothers to new-borns.

335

336 **Fig 2. Cluster analysis of phenotypic susceptibility characteristics.** Depicts seven clusters  
337 comprising drug resistant isolates of *E. coli*, *K. pneumoniae* and *Enterobacter* spp. with similar  
338 profiles hence, potential transmission of MDR bacteria from mothers/environment to new-borns.  
339 Clusters of isolates with similar susceptibility characteristics are denoted with an asterisk (\*).

340

341 **Fig 3. Cluster analysis of genotypic susceptibility characteristics.** Depicts isolates of *E. coli*,  
342 *K. pneumoniae* and *Enterobacter* spp. with similar molecular susceptibility profiles hence,  
343 potential transmission of MDR bacteria from mothers to new-borns in the maternity ward.  
344 Clusters of isolates with similar genotypic characteristics are denoted with an asterisk (\*).

345

346 Overall, this study depicts a high recovery of *K. pneumoniae*, *Enterobacter* and *E. coli* with  
347 phenotypic and genotypic characteristics of multi-resistance in the maternity ward of Mulago  
348 hospital. The clustering of phenotypic and genotypic profiles by time and space suggests active  
349 transmission between mother and new-born babies, as well as health workers and their maternity  
350 ward environment. This calls into question the effectiveness of infection prevention and control  
351 strategies, given the isolation of these potential pathogens from healthcare equipment, ward  
352 environment and the patients. However, the fact that bacteria were also isolated from participants  
353 on admission into the hospital, there is an indication that some of the profiles could be acquired  
354 from the community before the mothers are admitted, suggesting a role of community as a  
355 contributor to the diversity of organisms observed in this study, **Fig 4.**

356 **Fig 4. Hypothetical sources of MDR *K. pneumoniae*, *Enterobacter*, and *E. coli* for neonates.**

357



358 Additionally, the high prevalence of *K. pneumoniae*, *Enterobacter* and *E. coli* in mothers and  
359 their babies could reflect the hygiene levels of items mothers use during hospital admission.  
360 These findings are in line with studies in similar settings for example, Kayange et al who looked  
361 at the predictors of positive blood culture and deaths among neonates with suspected neonatal  
362 sepsis in a tertiary hospital in Mwanza, Tanzania [1]. As well, in Kenya a study that investigated  
363 hospital acquired infections in a private pediatrics' hospital found *K. pneumoniae* to be the most  
364 prevalent followed by *Pseudomonas aeruginosa* and *Enterobacter cloacae* [24].

365  
366 Moreover, the MDR high levels among isolates in this study suggests high selection pressure in  
367 the hospital [25], as well as overuse and inappropriate use of antibiotics [26]. Indeed, there was  
368 high carriage of drug resistance encoding genes (especially ESBL genes) among the isolates,  
369 which means organisms have acquired resistance genes and disseminated them to other  
370 organisms, for example, through plasmids that can carry various genes [27]. Among ESBL-  
371 encoding genes, *bla<sub>CTX-M</sub>*, *bla<sub>SHV</sub>* and *bla<sub>TEM</sub>* were detected at rates comparable to previous  
372 studies [28]. Though, we found *bla<sub>CTX-M</sub>* as the most frequent gene while previous studies in  
373 similar settings reported *bla<sub>TEM</sub>* (48.7%) to be the most prevalent, followed by *bla<sub>CTX-M</sub>* (7.6%)  
374 and *bla<sub>SHV</sub>* (5.1%) [28]. We also found carriage of antibiotic resistant isolates by health workers  
375 to be comparable to that of studies done elsewhere [29][30][31]. Health workers can acquire  
376 bacterial contamination by direct contact with patients, body fluids secretions, or touching  
377 contaminated environmental surfaces within the hospital environment [32]. Just like in earlier  
378 studies in Uganda [33][23][6], the carbapenemase gene prevalence remains low at Mulago  
379 hospital; despite this, we identified carriage of more than one carbapenemase genes, suggesting  
380 enhanced drug resistance to carbapenems. Finally, spatial cluster analysis suggests transmission

381 between animate and inanimate or a shared source of contamination for the maternity ward; this  
382 source could be items like health worker's gloves, stethoscopes and other items which were not  
383 sampled in our study [34].

384

385 **Limitations:** The transmission investigation could have benefited from a more granular  
386 analytical method such as next generation sequencing to track the source using single nucleotide  
387 polymorphism. Due to resources this was not possible, none the less the findings provide clues  
388 that will be further examined as and when resources are obtained.

389

## 390 Conclusions

391 Our findings suggest a potentially high exposure rate of mothers and their new-born babies to a  
392 variety of MDR *Enterobacteriaceae* strains when admitted for elective surgical delivery. The  
393 potential sources of these strains were health workers, maternity ward environment as well as  
394 introductions from the community by mothers. The findings suggest inadequacies in infection  
395 control practices on the maternity ward. Given the high prevalence of ESBLs on the ward, we  
396 recommend that an urgent infection control protocol be implemented, and carry out more studies  
397 to look at other organisms and sample more items used in the hospital especially those which are  
398 shared by patients. Molecular techniques with a high discriminatory power such as DNA  
399 sequencing and/or Pulsed Field Gel electrophoresis should be considered in future studies.

400

## 401 Acknowledgments

402 Special thanks to staff at the Departments of Immunology and Molecular Biology and Medical  
403 Microbiology, Makerere University College of Health Sciences for the support they provided  
404 during the time the research was conducted, as well as the research participants who agreed to be  
405 part of this study. Finally, special thanks to the Cambridge group that collected the isolates and  
406 made them available to us. AM is a Chancellor's Fellow at the Roslin Institute and his time was  
407 paid core funding and as a Future leader fellow funded by BBSRC (BB/P007767/1) and  
408 Wellcome Trust ISSF3 (IS3-R1.09 19/20).

409

## 410 References

- 411 [1] N. Kayange, E. Kamugisha, D. L. Mwizamholya, S. Jeremiah, and S. E. Mshana,  
412 "Predictors of positive blood culture and deaths among neonates with suspected neonatal sepsis  
413 in a tertiary hospital, Mwanza- Tanzania," *BMC Pediatr.*, vol. 10, no. 1, p. 39, Jun. 2010, doi:  
414 10.1186/1471-2431-10-39.
- 415 [2] K. Tompkins, J. J. Juliano, and D. van Duin, "Antimicrobial Resistance in  
416 Enterobacteriales and Its Contribution to Sepsis in Sub-saharan Africa," *Front. Med.*, vol. 8,  
417 2021, Accessed: Feb. 21, 2023. [Online]. Available:  
418 <https://www.frontiersin.org/articles/10.3389/fmed.2021.615649>
- 419 [3] M. Singer *et al.*, "The Third International Consensus Definitions for Sepsis and Septic  
420 Shock (Sepsis-3)," *JAMA*, vol. 315, no. 8, pp. 801–810, Feb. 2016, doi:  
421 10.1001/jama.2016.0287.
- 422 [4] W.-H. Sheng, R. E. Badal, P.-R. Hsueh, and SMART Program, "Distribution of  
423 extended-spectrum  $\beta$ -lactamases, AmpC  $\beta$ -lactamases, and carbapenemases among  
424 Enterobacteriaceae isolates causing intra-abdominal infections in the Asia-Pacific region: results  
425 of the study for Monitoring Antimicrobial Resistance Trends (SMART)," *Antimicrob. Agents*  
426 *Chemother.*, vol. 57, no. 7, pp. 2981–2988, Jul. 2013, doi: 10.1128/AAC.00971-12.
- 427 [5] L. Ampaire, E. Nduhura, and I. Wewedru, "Phenotypic prevalence of extended spectrum  
428 beta-lactamases among enterobacteriaceae isolated at Mulago National Referral Hospital:  
429 Uganda," *BMC Res. Notes*, vol. 10, p. 448, Sep. 2017, doi: 10.1186/s13104-017-2786-3.
- 430 [6] D. Okoche, B. B. Asiiimwe, F. A. Katabazi, L. Kato, and C. F. Najjuka, "Prevalence and  
431 Characterization of Carbapenem-Resistant Enterobacteriaceae Isolated from Mulago National  
432 Referral Hospital, Uganda," *PloS One*, vol. 10, no. 8, p. e0135745, 2015, doi:  
433 10.1371/journal.pone.0135745.

- 434 [7] A. M. Queenan and K. Bush, "Carbapenemases: the Versatile  $\beta$ -Lactamases," *Clin.*  
435 *Microbiol. Rev.*, vol. 20, no. 3, pp. 440–458, Jul. 2007, doi: 10.1128/CMR.00001-07.
- 436 [8] X. Cui, H. Zhang, and H. Du, "Carbapenemases in Enterobacteriaceae: Detection and  
437 Antimicrobial Therapy," *Front. Microbiol.*, vol. 10, 2019, Accessed: Feb. 21, 2023. [Online].  
438 Available: <https://www.frontiersin.org/articles/10.3389/fmicb.2019.01823>
- 439 [9] F. Baquero, M. C. Negri, M. I. Morosini, and J. Blázquez, "Antibiotic-selective  
440 environments," *Clin. Infect. Dis. Off. Publ. Infect. Dis. Soc. Am.*, vol. 27 Suppl 1, pp. S5-11,  
441 Aug. 1998, doi: 10.1086/514916.
- 442 [10] J. Isendahl, A. Turlej-Rogacka, C. Manjuba, A. Rodrigues, C. G. Giske, and P. Nauc ler,  
443 "Fecal Carriage of ESBL-Producing *E. coli* and *K. pneumoniae* in Children in Guinea-Bissau: A  
444 Hospital-Based Cross-Sectional Study," *PLOS ONE*, vol. 7, no. 12, p. e51981, Dec. 2012, doi:  
445 10.1371/journal.pone.0051981.
- 446 [11] R. Friedmann *et al.*, "Prospective Evaluation of Colonization with Extended-Spectrum  $\beta$ -  
447 Lactamase (ESBL)–Producing Enterobacteriaceae Among Patients at Hospital Admission and of  
448 Subsequent Colonization with ESBL-Producing Enterobacteriaceae Among Patients During  
449 Hospitalization," *Infect. Control Hosp. Epidemiol.*, vol. 30, no. 6, pp. 534–542, Jun. 2009, doi:  
450 10.1086/597505.
- 451 [12] J. N. Kateregga, R. Kantume, C. Atuhaire, M. N. Lubowa, and J. G. Ndukui, "Phenotypic  
452 expression and prevalence of ESBL-producing Enterobacteriaceae in samples collected from  
453 patients in various wards of Mulago Hospital, Uganda," *BMC Pharmacol. Toxicol.*, vol. 16, p.  
454 14, Jun. 2015, doi: 10.1186/s40360-015-0013-1.
- 455 [13] J. T. Freeman *et al.*, "Predictors of hospital surface contamination with Extended-  
456 spectrum  $\beta$ -lactamase-producing *Escherichia coli* and *Klebsiella pneumoniae*: patient and  
457 organism factors," *Antimicrob. Resist. Infect. Control*, vol. 3, p. 5, Feb. 2014, doi: 10.1186/2047-  
458 2994-3-5.
- 459 [14] K. C. Iregbu, K. O. Zubair, I. F. Modibbo, A. I. Aigbe, S. A. Sonibare, and O. M. Ayoola,  
460 "Neonatal infections caused by *Escherichia coli* at the National Hospital, Abuja: a three-year  
461 retrospective study," *Afr. J. Clin. Exp. Microbiol.*, vol. 14, no. 2, Art. no. 2, May 2013, doi:  
462 10.4314/ajcem.v14i2.9.
- 463 [15] M. Uemura *et al.*, "Strain-specific transmission in an outbreak of ESBL-producing  
464 Enterobacteriaceae in the hemato-oncology care unit: a cohort study," *BMC Infect. Dis.*, vol. 17,  
465 no. 1, p. 26, Jan. 2017, doi: 10.1186/s12879-016-2144-4.
- 466 [16] T. Stadler *et al.*, "Transmission of ESBL-producing Enterobacteriaceae and their mobile  
467 genetic elements—identification of sources by whole genome sequencing: study protocol for an  
468 observational study in Switzerland," *BMJ Open*, vol. 8, no. 2, p. e021823, Feb. 2018, doi:  
469 10.1136/bmjopen-2018-021823.
- 470 [17] "Mulago: the world's busiest labour suite," *New Vision*.  
471 <https://www.newvision.co.ug/articledetails/1319539> (accessed Feb. 21, 2023).
- 472 [18] B. M. S. AL-Joda and A. H. Jasim, "Biochemical Testing Revision For Identification  
473 Several Kinds of Bacteria," *May*, 2021.
- 474 [19] "M100-S25: Performance Standards for Antimicrobial Susceptibility Testing; Twenty-  
475 Fifth Informational Supplement".
- 476 [20] J. B. Patel and Clinical and Laboratory Standards Institute, *Performance standards for*  
477 *antimicrobial susceptibility testing*. 2017.
- 478 [21] J. Kaur, S. Chopra, Sheevani, and G. Mahajan, "Modified Double Disc Synergy Test to  
479 Detect ESBL Production in Urinary Isolates of *Escherichia coli* and *Klebsiella pneumoniae*," *J.*

480 *Clin. Diagn. Res. JCDR*, vol. 7, no. 2, pp. 229–233, Feb. 2013, doi:  
481 10.7860/JCDR/2013/4619.2734.

482 [22] A. Amjad, I. Mirza, S. Abbasi, U. Farwa, N. Malik, and F. Zia, “Modified Hodge test: A  
483 simple and effective test for detection of carbapenemase production,” *Iran. J. Microbiol.*, vol. 3,  
484 no. 4, pp. 189–193, Dec. 2011.

485 [23] D. P. Kateete, R. Nakanjako, J. Namugenyi, J. Erume, M. L. Joloba, and C. F. Najjuka,  
486 “Carbapenem resistant *Pseudomonas aeruginosa* and *Acinetobacter baumannii* at Mulago  
487 Hospital in Kampala, Uganda (2007–2009),” *SpringerPlus*, vol. 5, no. 1, p. 1308, Aug. 2016,  
488 doi: 10.1186/s40064-016-2986-7.

489 [24] R. K. Patil, B. Kabera, C. K. Muia, and B. M. Ale, “Hospital acquired infections in a  
490 private paediatric hospital in Kenya: a retrospective cross-sectional study,” *Pan Afr. Med. J.*, vol.  
491 41, no. 28, Art. no. 28, Jan. 2022, doi: 10.11604/pamj.2022.41.28.25820.

492 [25] Y. Habboush, S. N. S. Yarrarapu, and N. Guzman, “Infection Control,” in *StatPearls*,  
493 Treasure Island (FL): StatPearls Publishing, 2022. Accessed: Feb. 21, 2023. [Online]. Available:  
494 <http://www.ncbi.nlm.nih.gov/books/NBK519017/>

495 [26] R. Cantón, J. P. Horcajada, A. Oliver, P. R. Garbajosa, and J. Vila, “Inappropriate use of  
496 antibiotics in hospitals: The complex relationship between antibiotic use and antimicrobial  
497 resistance,” *Enfermedades Infecc. Microbiol. Clínica*, vol. 31, pp. 3–11, Sep. 2013, doi:  
498 10.1016/S0213-005X(13)70126-5.

499 [27] N. K. Fursova, A. A. Kislichkina, and O. E. Khokhlova, “Plasmids Carrying  
500 Antimicrobial Resistance Genes in Gram-Negative Bacteria,” *Microorganisms*, vol. 10, no. 8, p.  
501 1678, Aug. 2022, doi: 10.3390/microorganisms10081678.

502 [28] T. Bajpai, M. Pandey, M. Varma, and G. S. Bhatambare, “Prevalence of TEM, SHV, and  
503 CTX-M Beta-Lactamase genes in the urinary isolates of a tertiary care hospital,” *Avicenna J.*  
504 *Med.*, vol. 7, no. 1, pp. 12–16, 2017, doi: 10.4103/2231-0770.197508.

505 [29] S. Visalachy, K. K. Palraj, S. S. Kopula, and U. Sekar, “Carriage of Multidrug Resistant  
506 Bacteria on Frequently Contacted Surfaces and Hands of Health Care Workers,” *J. Clin. Diagn.*  
507 *Res. JCDR*, vol. 10, no. 5, pp. DC18–DC20, May 2016, doi: 10.7860/JCDR/2016/19692.7772.

508 [30] B. K. Decker *et al.*, “Healthcare personnel intestinal colonization with multidrug-resistant  
509 organisms,” *Clin. Microbiol. Infect. Off. Publ. Eur. Soc. Clin. Microbiol. Infect. Dis.*, vol. 24, no.  
510 1, p. 82.e1-82.e4, Jan. 2018, doi: 10.1016/j.cmi.2017.05.010.

511 [31] E. Tajeddin *et al.*, “The role of the intensive care unit environment and health-care  
512 workers in the transmission of bacteria associated with hospital acquired infections,” *J. Infect.*  
513 *Public Health*, vol. 9, no. 1, pp. 13–23, 2016, doi: 10.1016/j.jiph.2015.05.010.

514 [32] V. Russotto *et al.*, “What Healthcare Workers Should Know about Environmental  
515 Bacterial Contamination in the Intensive Care Unit,” *BioMed Res. Int.*, vol. 2017, p. 6905450,  
516 2017, doi: 10.1155/2017/6905450.

517 [33] D. P. Kateete, R. Nakanjako, M. Okee, M. L. Joloba, and C. F. Najjuka, “Genotypic  
518 diversity among multidrug resistant *Pseudomonas aeruginosa* and *Acinetobacter* species at  
519 Mulago Hospital in Kampala, Uganda,” *BMC Res. Notes*, vol. 10, no. 1, p. 284, Jul. 2017, doi:  
520 10.1186/s13104-017-2612-y.

521 [34] N. A. Mushabati *et al.*, “Bacterial contamination of mobile phones of healthcare workers  
522 at the University Teaching Hospital, Lusaka, Zambia,” *Infect. Prev. Pract.*, vol. 3, no. 2, p.  
523 100126, Feb. 2021, doi: 10.1016/j.infpip.2021.100126.

524

525

526 **Supporting information**

527

528 **S 1 Table.** Primer sequences used to PCR-amplify ESBL-encoding and carbapenemase-encoding  
529 genes.

530

531 **S2 Table.** Frequency and distribution of antibiotic resistance genetic elements among PCR-  
532 positive isolates.

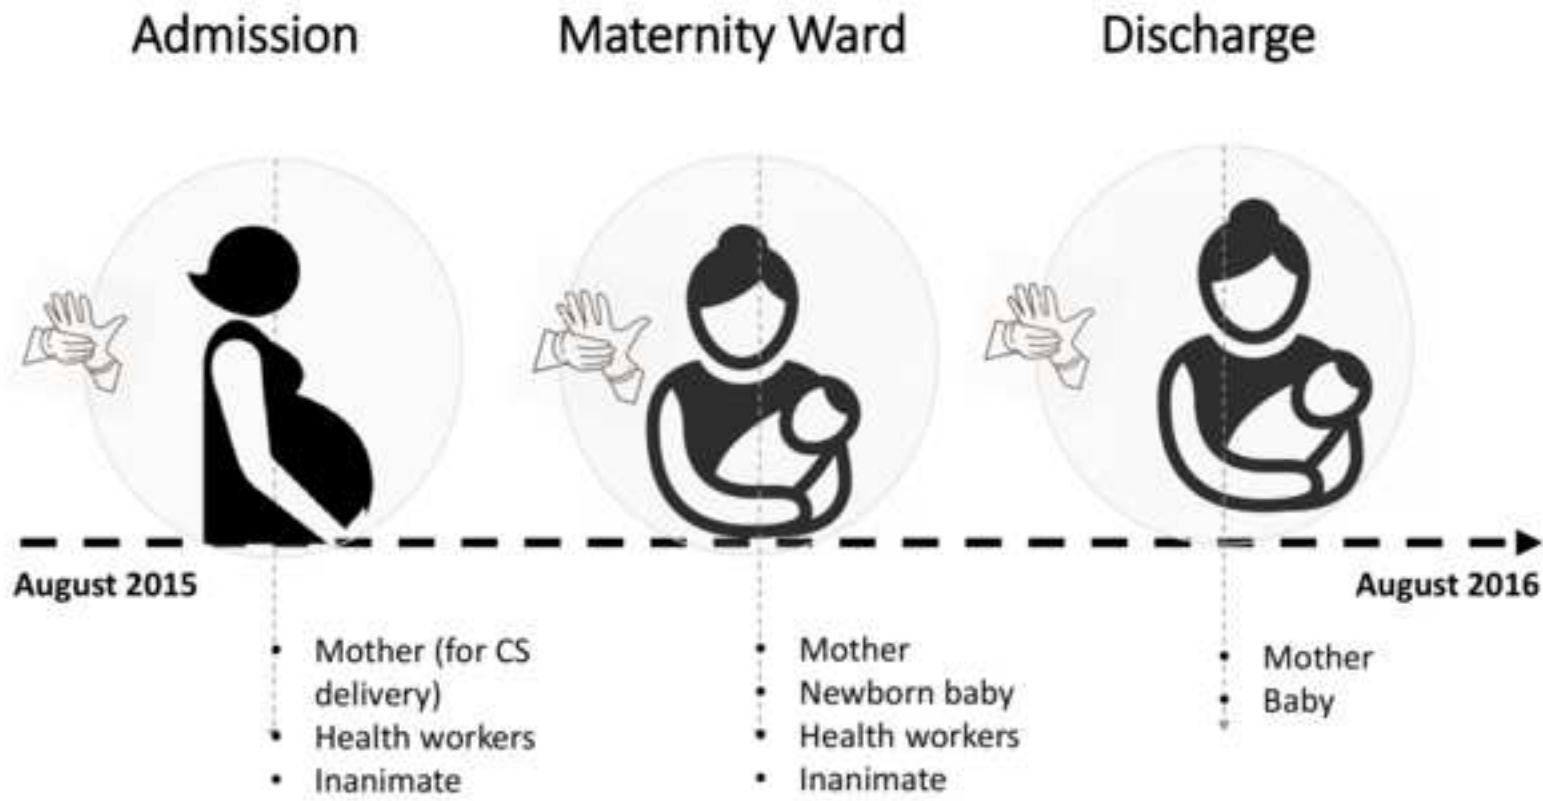

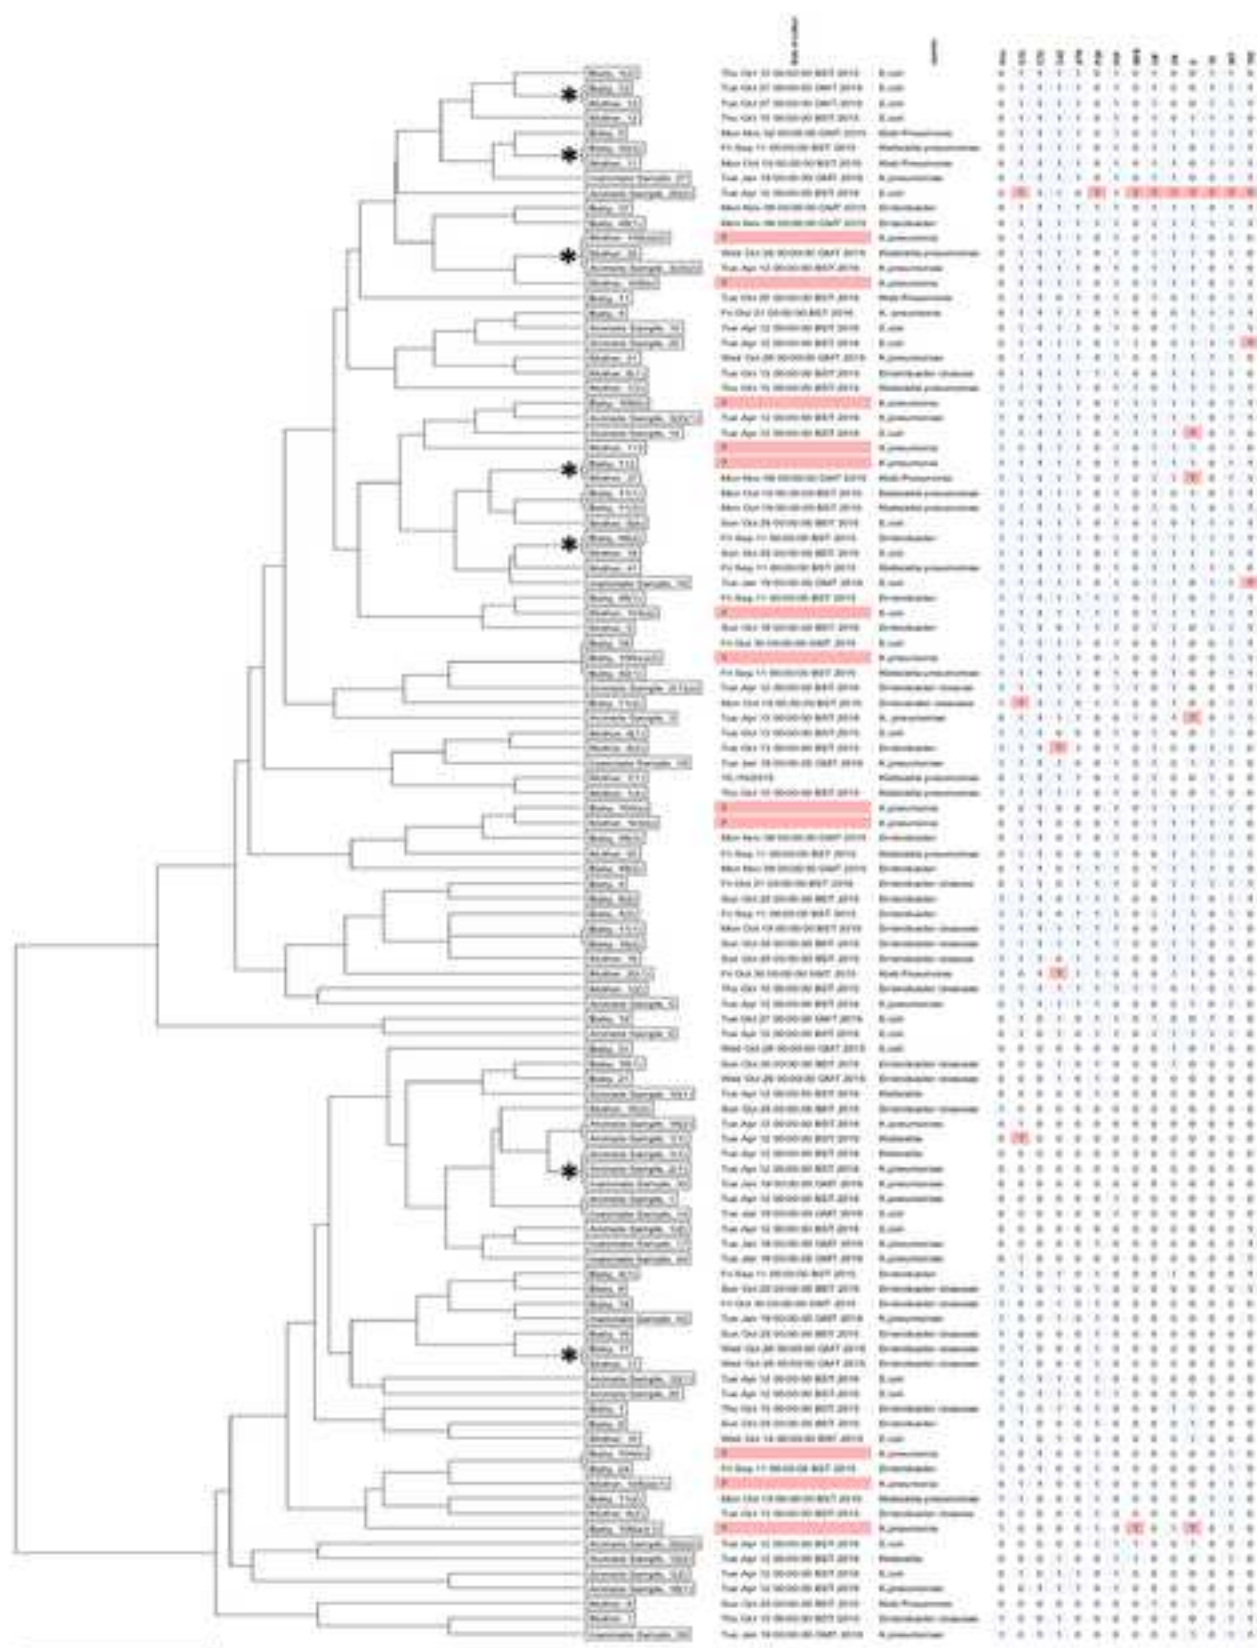

© 2014 The Author. All rights reserved. This article is published with open access at <http://www.ncbi.nlm.nih.gov/pmc/articles/PMC4111111/>



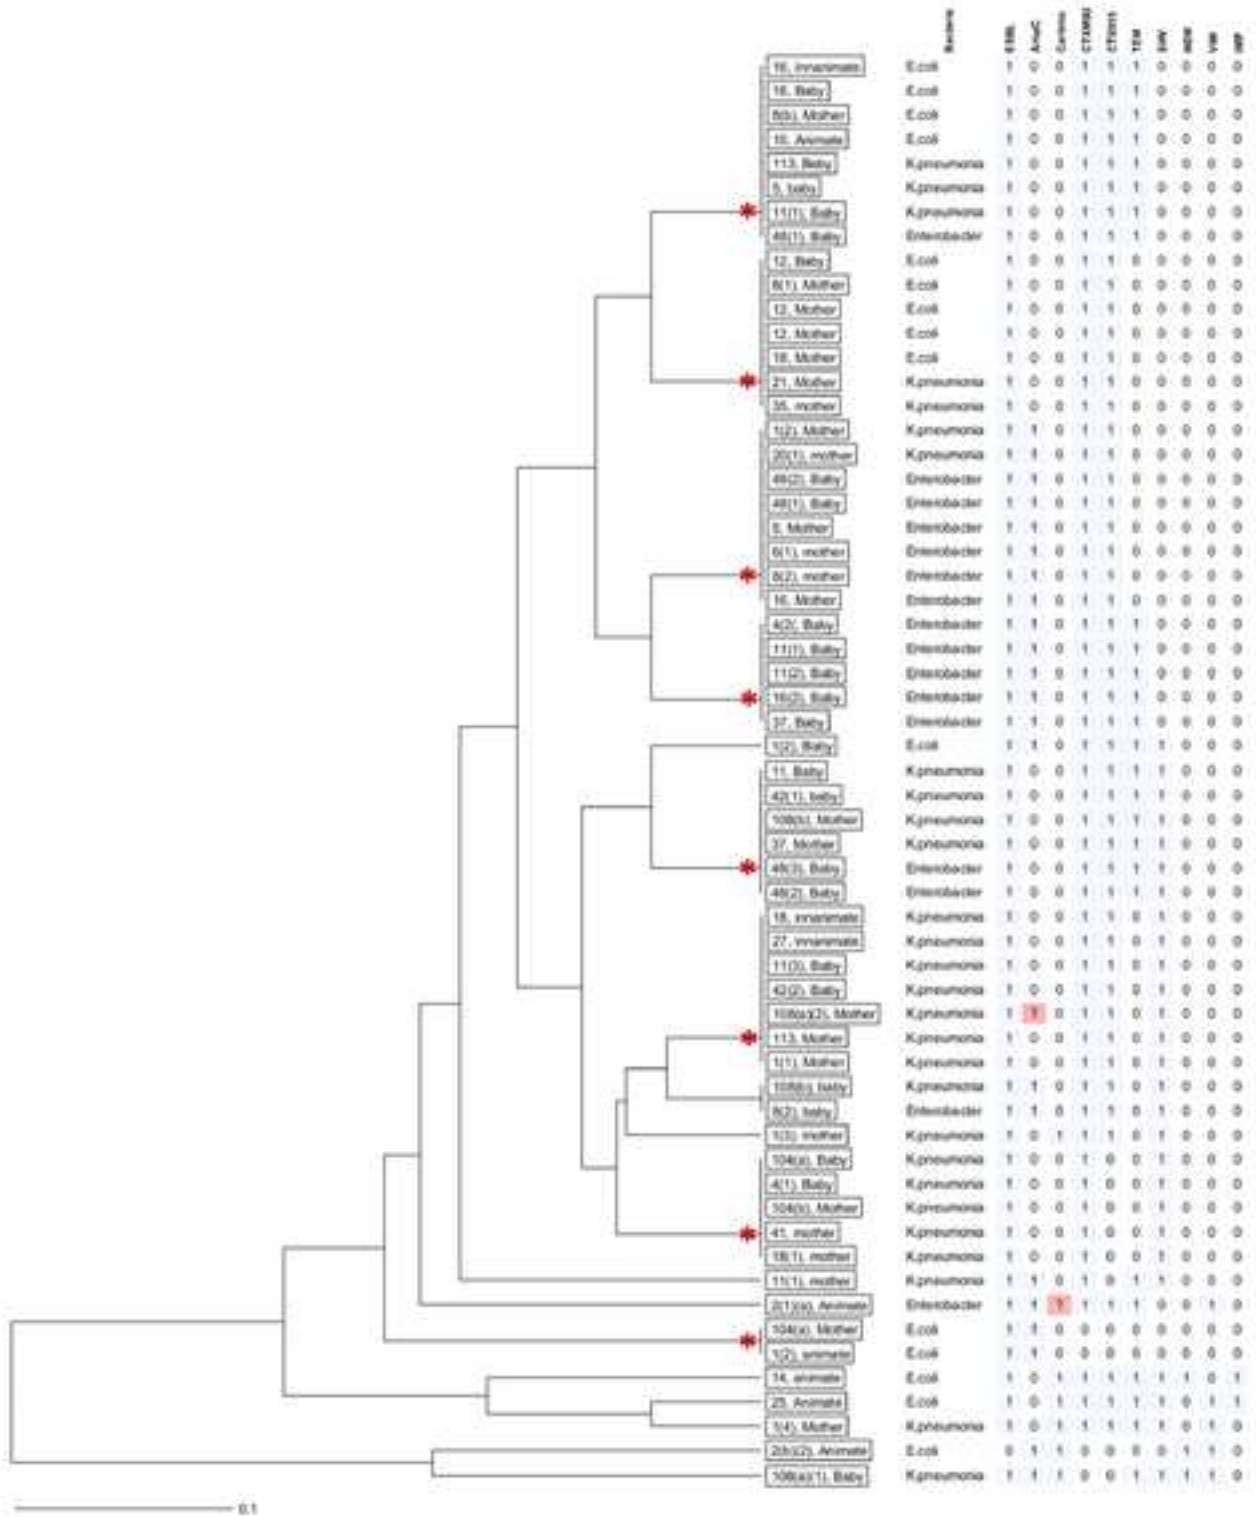

UPOM tree based on 10 columns, zeroes opening missing values, % column difference

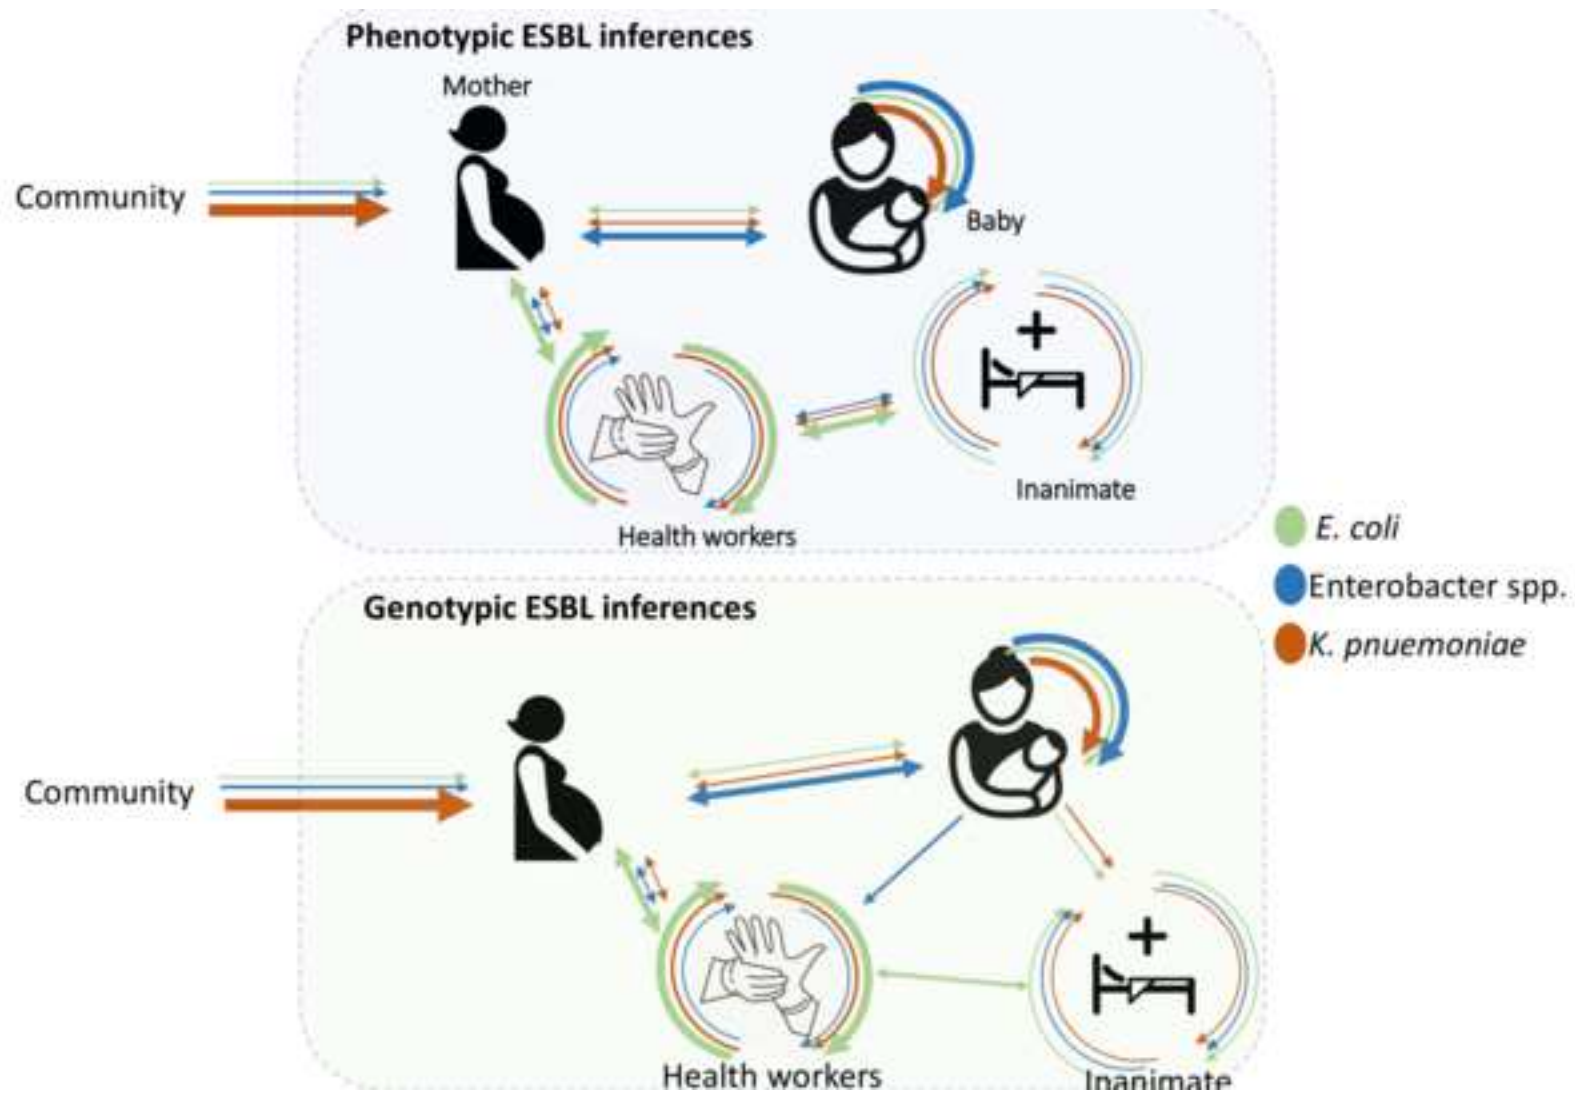



Click here to access/download  
**Supporting Information**  
S 1 Table.docx





Click here to access/download  
**Supporting Information**  
S2 Table.docx



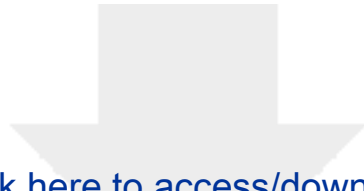

[Click here to access/download](#)

**Supporting Information**

[STROBE-checklist-v4-combined-PlosMedicine-S2.docx](#)

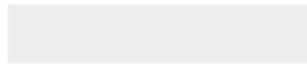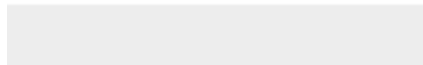

Supplement: pone.0286955.s005.pdf [file pone.0286955.s005.pdf]
